# Supplementary material for: Diel Rhythmicity of Field Responses to Synthetic Pheromone Lures in the Pine Sawyer Monochamus saltuarius
Source: MDPI journal article supplement (doi:10.3390/insects12050441), 2021-05-12
Supplement: s1 [file s1]

## Supplemental Information

# Diel rhythmicity of field responses to synthetic pheromone lures in the pine sawyer *Monochamus saltuarius*

Junheon Kim<sup>1,\*</sup>, Young Hak Jung<sup>2</sup>, Sang-Myeong Lee<sup>2</sup>

<sup>1</sup> Forest Insect Pests and Diseases Division, National Institute of Forest Science, Seoul 02455, Republic of Korea; junheonkim@korea.kr

<sup>2</sup> SM Biovision Co., Jinju, Gyeongnam, Republic of Korea; gkr315@naver.com; lsm1918@hanmail.net

\* Correspondence: junheonkim@korea.kr; Tel.: +82-2-961-2672

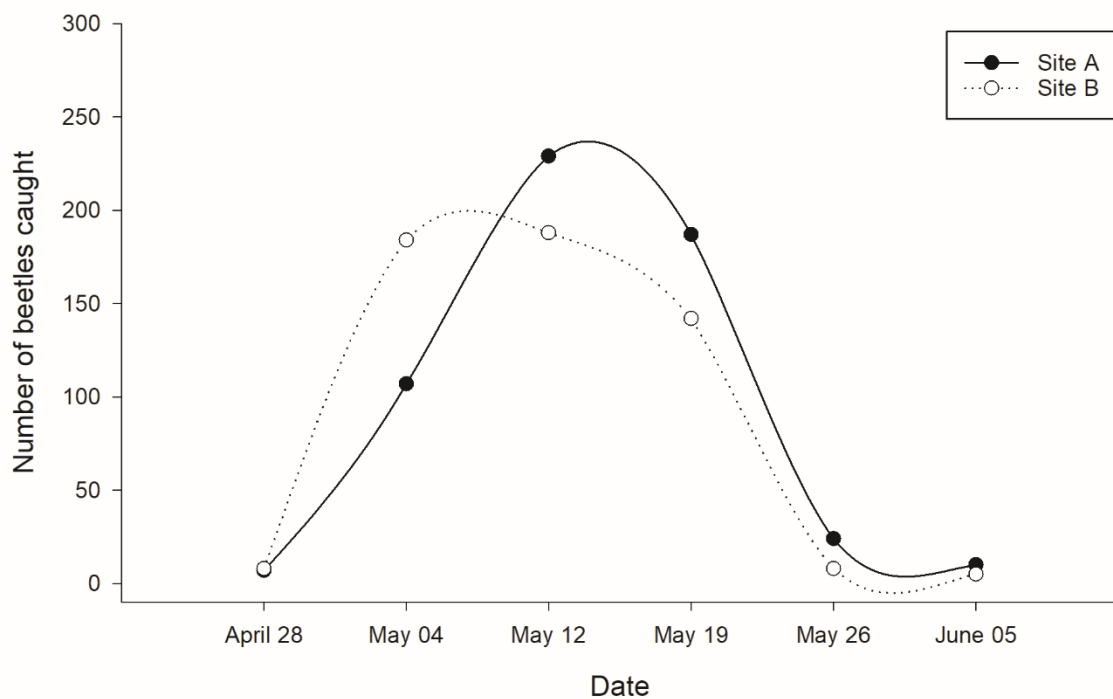

Figure S1. Sum of beetles caught in each treatment at site A and site B through the experimental periods.

Site A: Seongpyeong (36°39'27"N, 128°24'01"E), Yecheon, Gyeongsangbuk-do, Treatment : spray interval

Site B: Susim (36°39'23"N, 128°24'00"E), Yecheon, Gyeongsangbuk-do, Treatement: spray period
